# Supplementary material
Source: publisher site journal article supplement (https://www.dovepress.com/article/589554)
Supplement: Supplementary file 1 [file 589554%20Revised%20%2509Supplementary%20Tables.docx]

**Supplementary Tables**

Internal Consistency Reliability

| **Scale / Domain** | **Cronbach’s Alpha (α)** | **Interpretation** |
| --- | --- | --- |
| Overall Scale | 0.9339 | Excellent |
| Staff Interaction & Communication  (items: A, B, C) | 0.8454 | Good |
| Physical Environment & Operations  (items: D, E , F) | 0.7856 | Good |
| Trial Procedure & Experience  (items: G, H, I) | 0.8272 | Good |
| Health Outcomes & Perceived Benefits  (items: J, K, L) | 0.8312 | Good |
| Motivation & Future Participation  (items: M, N , O) | 0.8356 | Good |

Sampling Adequacy and Suitability for Factor Analysis

| **Test** | **Value** | **Interpretation** |
| --- | --- | --- |
| Kaiser–Meyer–Olkin (Overall) | 0.8969 | Excellent sampling adequacy |
| Likelihood Ratio Test (Independent vs Saturated) | χ²(105) = 1657.09 | Significant |
| p-value | < 0.001 | Correlation matrix suitable for factor analysis |

Eigenvalues and Variance Explained

| **Factor** | **Eigenvalue** | **% Variance Explained** | **Cumulative %** |
| --- | --- | --- | --- |
| Factor 1 | 8.406 | 79.17% | 79.17% |
| Factor 2 | 0.952 | 8.97% | 88.13% |
| Factor 3 | 0.725 | 6.83% | 94.96% |
| Factor 4 | 0.421 | 3.96% | 98.92% |
| Factor 5 | 0.342 | 3.22% | 102.14% |

Rotated Factor Loadings (Oblimin, Loadings ≥ 0.40)

| **Item** | **Factor 1** | **Factor 2** | **Factor 3** | **Interpretation** |
| --- | --- | --- | --- | --- |
| A | 0.798 | — | — | Strong loading |
| B | 0.720 | — | — | Strong loading |
| C | 0.837 | — | — | Strong loading |
| D | 0.816 | — | — | Strong loading |
| E | 0.548 | — | 0.460 | Minor cross-loading |
| F | 0.782 | — | — | Strong loading |
| G | 0.883 | — | — | Strong loading |
| H | 0.851 | — | — | Strong loading |
| I | 0.698 | — | — | Strong loading |
| J | 0.483 | 0.471 | — | Moderate cross-loading |
| K | 0.712 | 0.500 | — | Moderate cross-loading |
| L | 0.708 | 0.468 | — | Moderate cross-loading |
| M | 0.795 | — | — | Strong loading |
| N | 0.667 | — | 0.538 | Moderate cross-loading |
| O | 0.716 | — | 0.538 | Moderate cross-loading |

Communalities (1 – Uniqueness)

| **Item** | **Uniqueness** | **Communality** |
| --- | --- | --- |
| A | 0.2406 | 0.7594 |
| B | 0.3087 | 0.6913 |
| C | 0.2061 | 0.7939 |
| D | 0.2411 | 0.7589 |
| E | 0.4767 | 0.5233 |
| F | 0.2956 | 0.7044 |
| G | 0.1836 | 0.8164 |
| H | 0.1555 | 0.8445 |
| I | 0.3139 | 0.6861 |
| J | 0.5164 | 0.4836 |
| K | 0.2200 | 0.7800 |
| L | 0.2726 | 0.7274 |
| M | 0.2918 | 0.7082 |
| N | 0.2490 | 0.7510 |
| O | 0.1827 | 0.8173 |

1-Factor Solution (Unidimensionality Assessment)

| **Item** | **Factor 1 Loading** |
| --- | --- |
| A | 0.770 |
| B | 0.735 |
| C | 0.803 |
| D | 0.782 |
| E | 0.561 |
| F | 0.771 |
| G | 0.852 |
| H | 0.833 |
| I | 0.752 |
| J | 0.534 |
| K | 0.755 |
| L | 0.760 |
| M | 0.787 |
| N | 0.718 |
| O | 0.744 |
